# Supplementary material for: A retrotransposon storm marks clinical phenoconversion to late-onset Alzheimer’s disease
Source: Springer Nature journal article supplement (doi:10.1007/s11357-022-00580-w), 2022-05-19

chr1:162806970-162811379\_L1PA5 HSD17B7  
PREvsPOST pVal: 0 logFC: 3.3  
PREvsNORMAL pVal: 0 logFC: 1.76

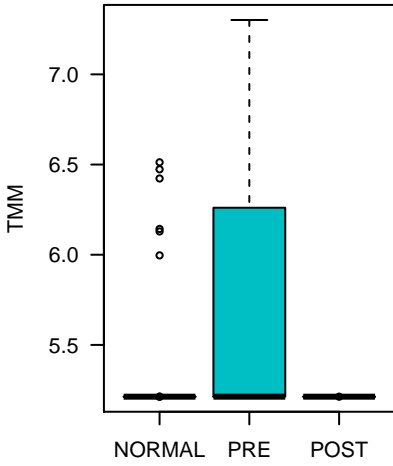

chr10:109812438-109818457\_L1HS .  
PREvsPOST pVal: 0 logFC: -2.93  
PREvsNORMAL pVal: 3e-04 logFC: -1.86

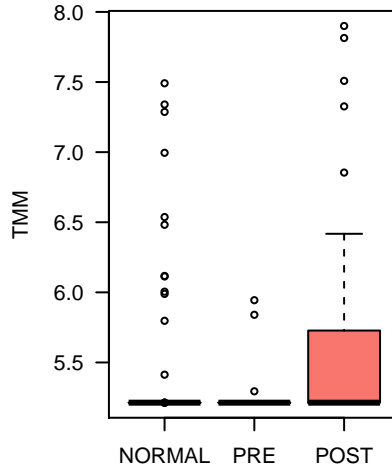

chr13:43849354-43851286\_L1MDa CCDC122  
PREvsPOST pVal: 0 logFC: -2.32  
PREvsNORMAL pVal: 0.0046 logFC: -1.52

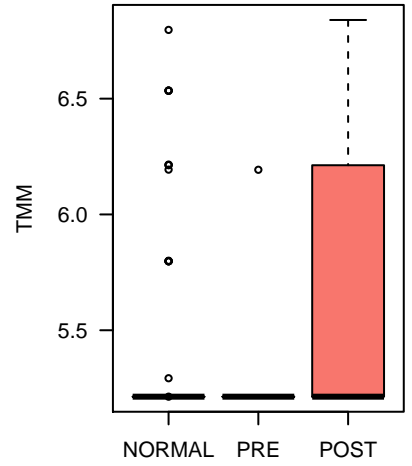

chr9:85611983-85612896\_MER21C AGTPBP1  
PREvsPOST pVal: 0 logFC: 2.48  
PREvsNORMAL pVal: 3e-04 logFC: 1.57

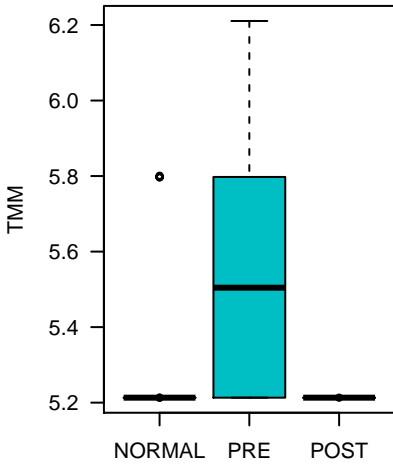

chr21:25918368-25924392\_L1PA2 APP  
PREvsPOST pVal: 0 logFC: 2.43  
PREvsNORMAL pVal: 2e-04 logFC: 1.53

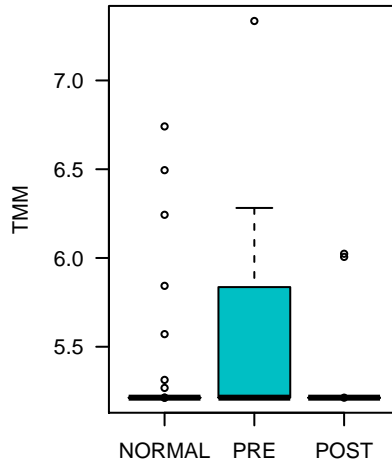

chr6:24811658-24817706\_L1HS RIPOR2  
PREvsPOST pVal: 0 logFC: -2.37  
PREvsNORMAL pVal: 0 logFC: -2.34

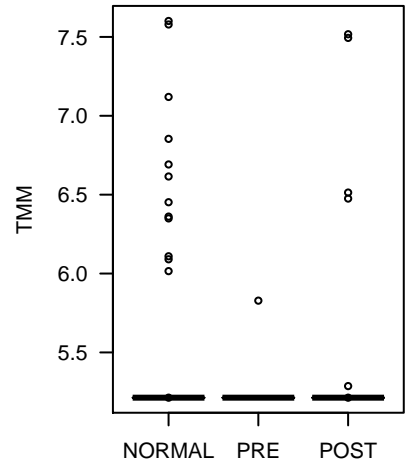

chr17:65039026-65039856\_L2c GNA13  
PREvsPOST pVal: 1e-04 logFC: 2.35  
PREvsNORMAL pVal: 0 logFC: 2.41

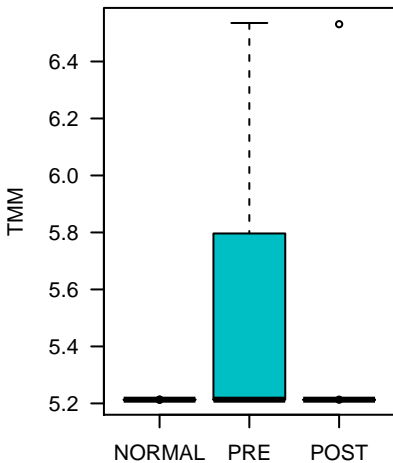

chr4:112192349-112194767\_L1PA3 C4orf32  
PREvsPOST pVal: 1e-04 logFC: -2.09  
PREvsNORMAL pVal: 5e-04 logFC: -1.7

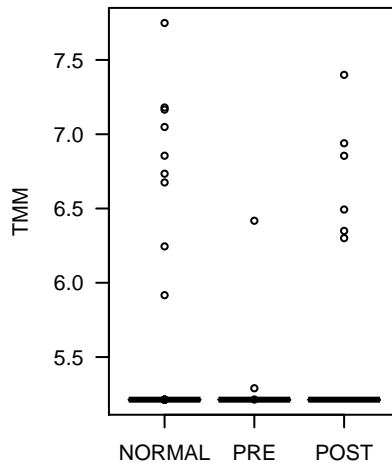

chr9:41393102-41393366\_Alujr4 .  
PREvsPOST pVal: 1e-04 logFC: -2.28  
PREvsNORMAL pVal: 0 logFC: -2.49

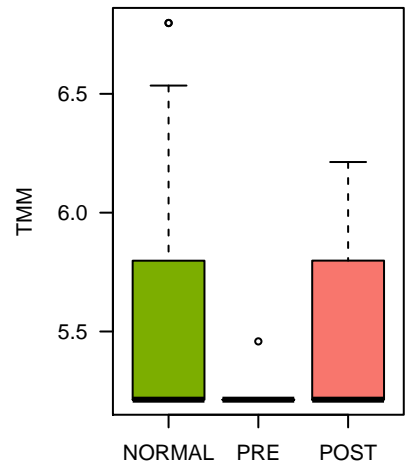

chr15:43166555-43168172\_SVA\_D TMEM62  
PREvsPOST pVal: 1e-04 logFC: -2.12  
PREvsNORMAL pVal: 0.0014 logFC: -1.51

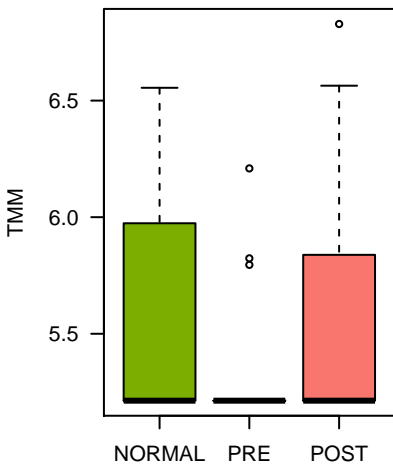

chr10:95773666-95775624\_L1P2 ENTDP1  
PREvsPOST pVal: 1e-04 logFC: 1.99  
PREvsNORMAL pVal: 0 logFC: 1.79

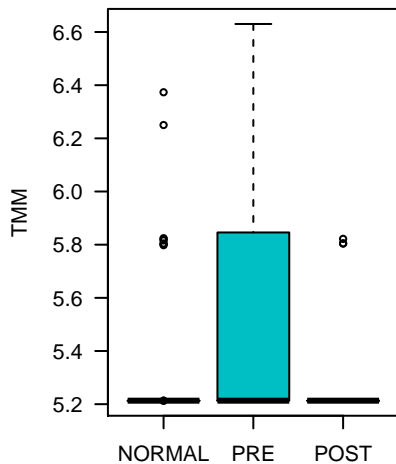

chr1:150585410-150585721\_AluSq2  
PREvsPOST pVal: 2e-04 logFC: 2.18  
PREvsNORMAL pVal: 9e-04 logFC: 1.55

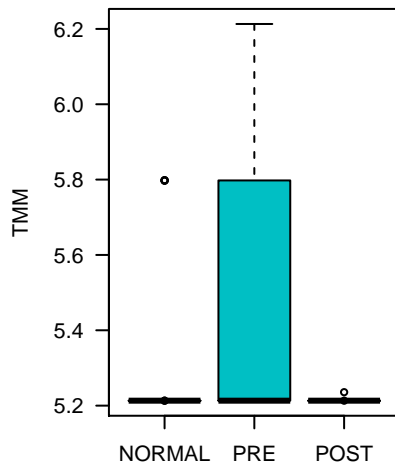

chr2:87061184-87061891\_L1MB8  
PREvsPOST pVal: 2e-04 logFC: 2.16  
PREvsNORMAL pVal: 1e-04 logFC: 1.81

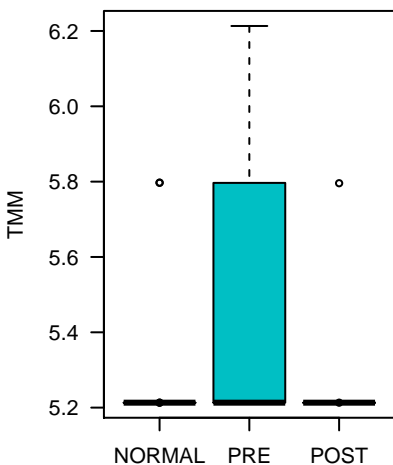

chrX:9503010-9506979\_L1PA8A TBL1X  
PREvsPOST pVal: 2e-04 logFC: 2.15  
PREvsNORMAL pVal: 8e-04 logFC: 1.51

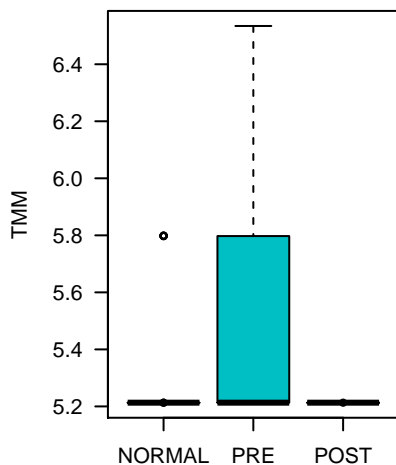

chr4:165849-171989\_L1PA4  
PREvsPOST pVal: 2e-04 logFC: -1.74  
PREvsNORMAL pVal: 0 logFC: -1.8

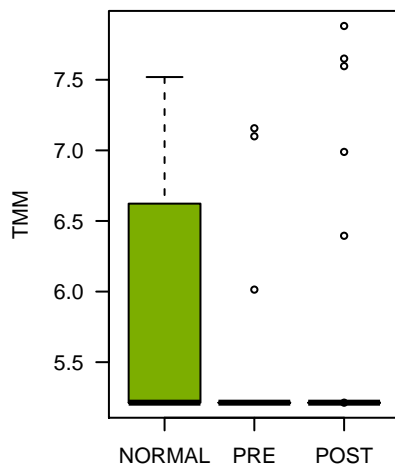

chr8:12217574-12223144\_HERVK-int  
PREvsPOST pVal: 3e-04 logFC: 1.99  
PREvsNORMAL pVal: 1e-04 logFC: 1.73

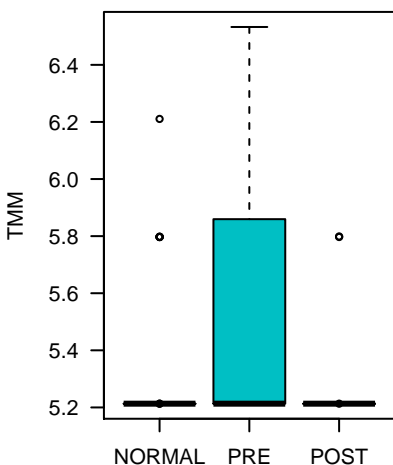

chr9:138195654-138197509\_L1PA10  
PREvsPOST pVal: 3e-04 logFC: -2.08  
PREvsNORMAL pVal: 0 logFC: -2.36

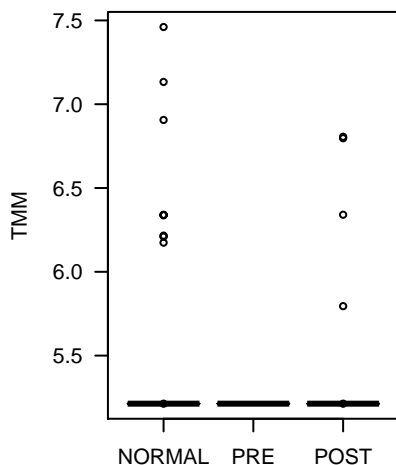

chr1:148611864-148613326\_HERV1-int NBPF14  
PREvsPOST pVal: 4e-04 logFC: 2.07  
PREvsNORMAL pVal: 1e-04 logFC: 1.81

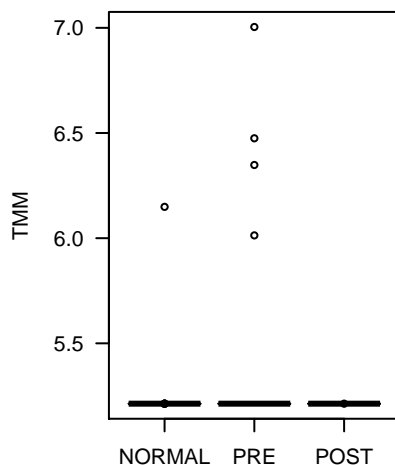

chr12:128941564-128941868\_Alusg GLT1D1  
PREvsPOST pVal: 4e-04 logFC: 2.06  
PREvsNORMAL pVal: 1e-04 logFC: 1.81

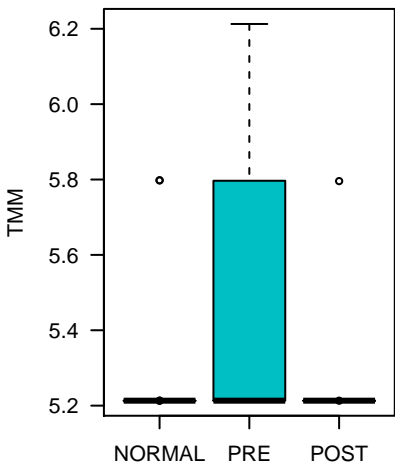

chr15:92122393-92123133\_L1ME3 SLCO3A1  
PREvsPOST pVal: 4e-04 logFC: 2.05  
PREvsNORMAL pVal: 9e-04 logFC: 1.53

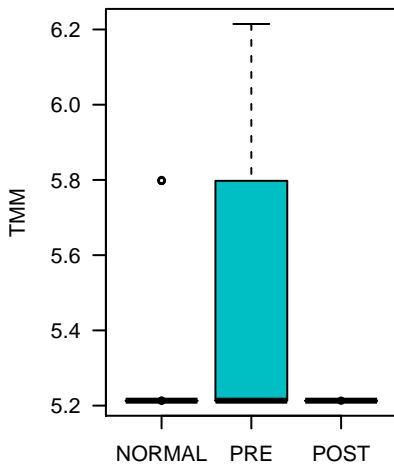

chr2:227540198-227544146\_L1PA5 AGFG1  
PREvsPOST pVal: 5e-04 logFC: 1.84  
PREvsNORMAL pVal: 0 logFC: 2.32

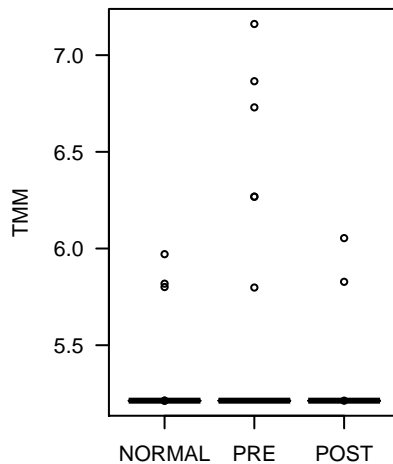

chr11:95870738-95876262\_L1PA4 MTMR2  
PREvsPOST pVal: 6e-04 logFC: -2  
PREvsNORMAL pVal: 0.0031 logFC: -1.75

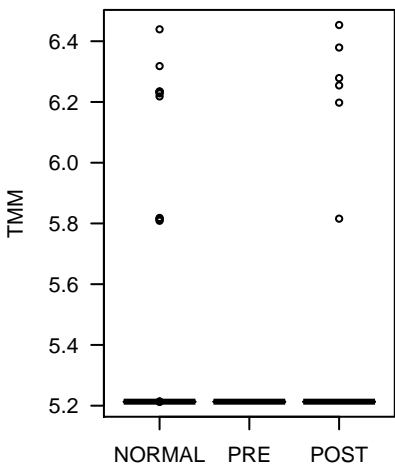

chr15:55382809-55384377\_Tigger1 CCGP1  
PREvsPOST pVal: 6e-04 logFC: 2  
PREvsNORMAL pVal: 0 logFC: 1.86

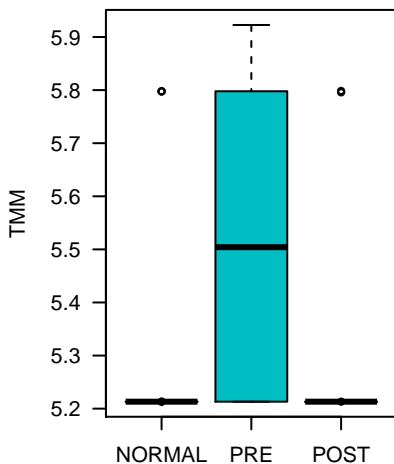

chr6:166425281-166429443\_L1PA3 RPS6KA2  
PREvsPOST pVal: 6e-04 logFC: 1.97  
PREvsNORMAL pVal: 0 logFC: 2.39

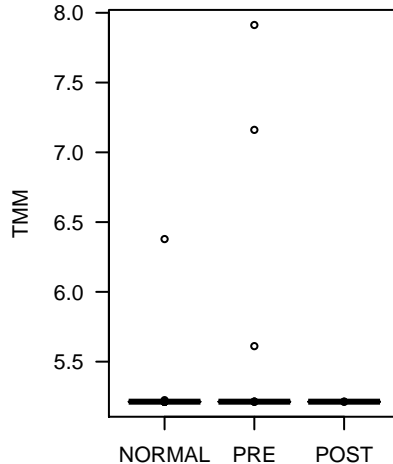

chr1:145843715-145844636\_L1MA4 .  
PREvsPOST pVal: 6e-04 logFC: -1.98  
PREvsNORMAL pVal: 0.0018 logFC: -1.74

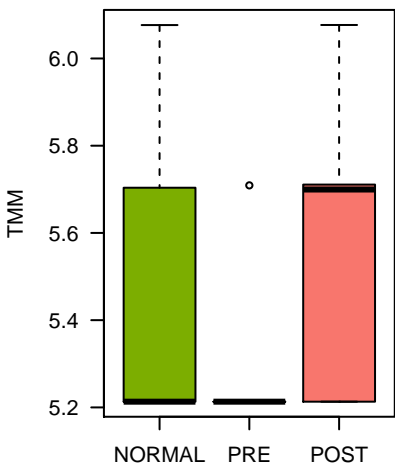

chr6:149691455-149692189\_L2 LATS1  
PREvsPOST pVal: 7e-04 logFC: 1.97  
PREvsNORMAL pVal: 0 logFC: 1.86

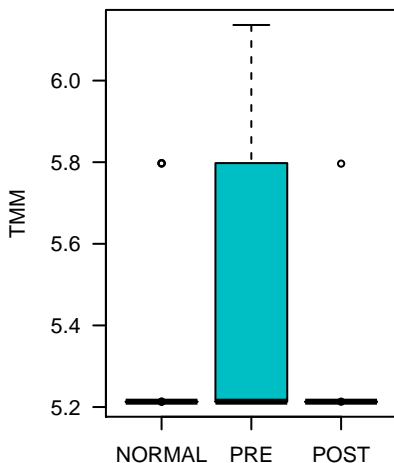

chr16:48591085-48592151\_HERV351-int N4BP1  
PREvsPOST pVal: 7e-04 logFC: 1.8  
PREvsNORMAL pVal: 0 logFC: 1.65

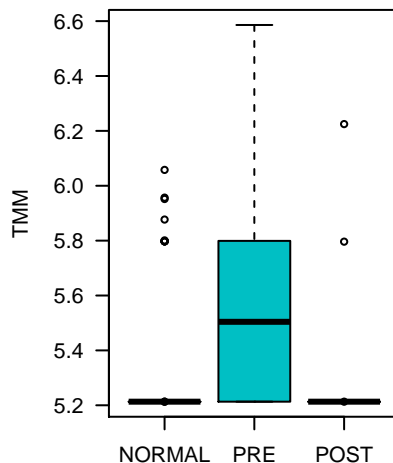

chr5:109332951-109333747\_L3  
PREvsPOST pVal: 8e-04 logFC: 1.7  
PREvsNORMAL pVal: 2e-04 logFC: 1.52

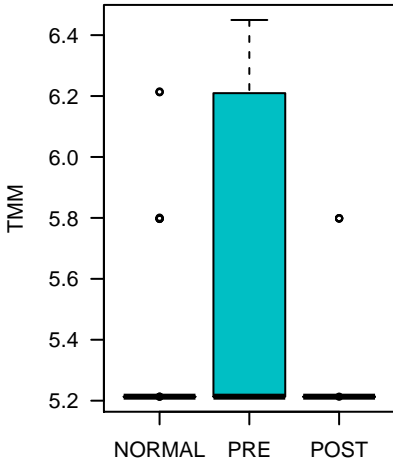

chr9:4992508-4993663\_MLT1G3-int JAK2  
PREvsPOST pVal: 8e-04 logFC: 1.93  
PREvsNORMAL pVal: 0 logFC: 1.91

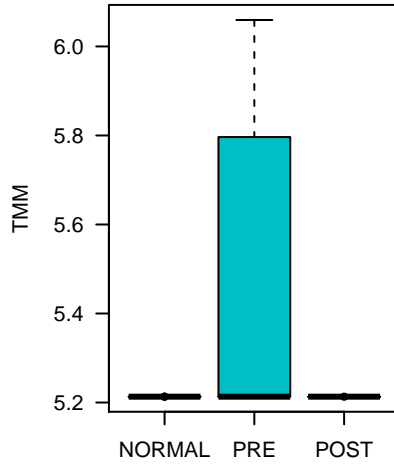

chr10:100277342-100278822\_SVA\_D BLOC1S2  
PREvsPOST pVal: 9e-04 logFC: 1.86  
PREvsNORMAL pVal: 0 logFC: 1.87

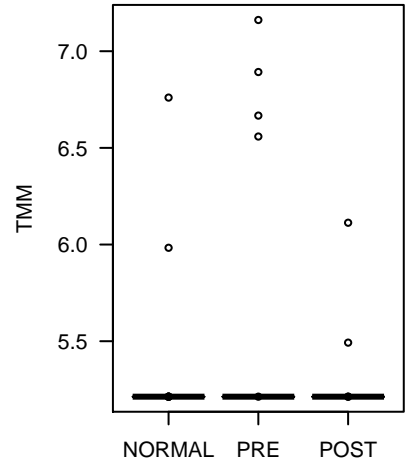

chr17:57843480-57843797\_MLT1A0 MRPS23  
PREvsPOST pVal: 0.001 logFC: 1.89  
PREvsNORMAL pVal: 9e-04 logFC: 1.57

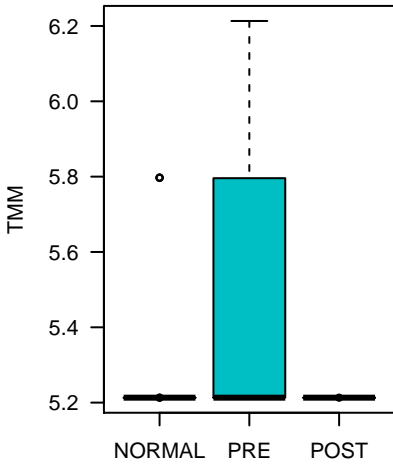

chr4:54043448-54047811\_L1PA4 RP11-231C18.3  
PREvsPOST pVal: 0.001 logFC: 1.84  
PREvsNORMAL pVal: 1e-04 logFC: 1.66

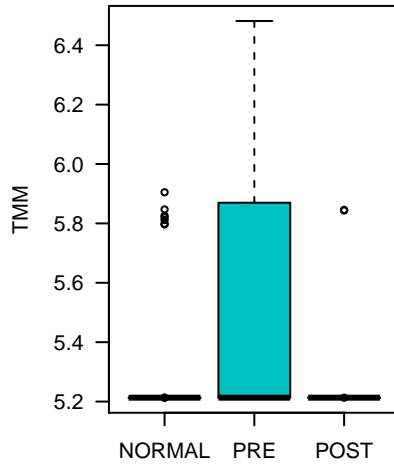

chr11:118563079-118563456\_L1MB4 IFT46  
PREvsPOST pVal: 0.0012 logFC: -1.9  
PREvsNORMAL pVal: 0.0033 logFC: -1.66

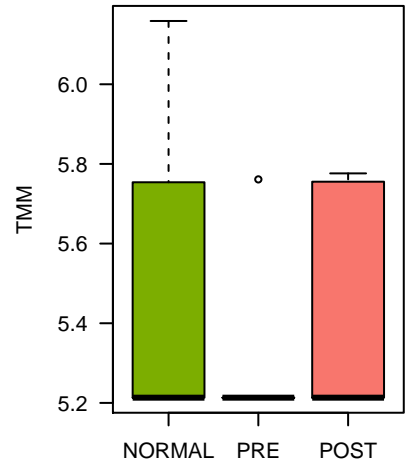

chr11:66091521-66093259\_L1PA3 PACS1  
PREvsPOST pVal: 0.0013 logFC: 1.81  
PREvsNORMAL pVal: 1e-04 logFC: 1.61

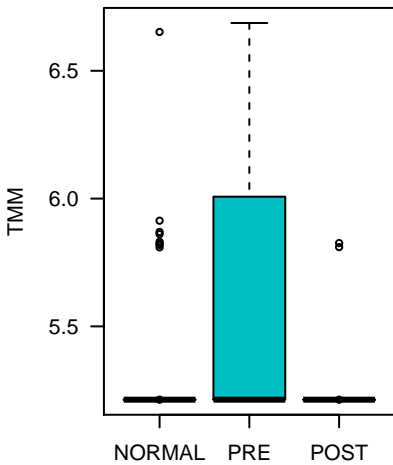

chr1:2245045-2245466\_L1MB3 SKI  
PREvsPOST pVal: 0.0013 logFC: 1.89  
PREvsNORMAL pVal: 1e-04 logFC: 1.74

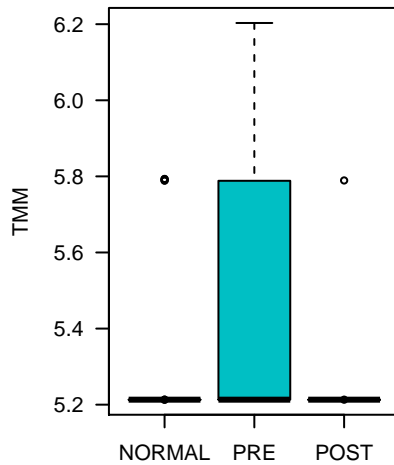

chr3:71603340-71604803\_L1ME1 RP11-154H23.4  
PREvsPOST pVal: 0.0013 logFC: 1.84  
PREvsNORMAL pVal: 9e-04 logFC: 1.53

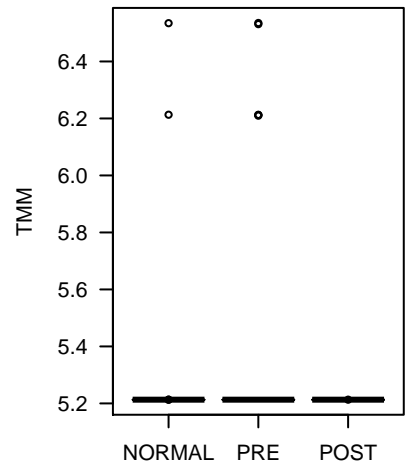

chr3:195425615-195426313\_L2b ACAP2  
PREvsPOST pVal: 0.0014 logFC: 1.88  
PREvsNORMAL pVal: 9e-04 logFC: 1.53

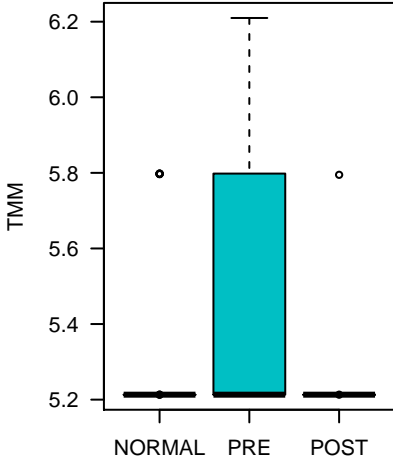

chr7:143707658-143708146\_MER1A TCAF2  
PREvsPOST pVal: 0.0014 logFC: 1.8  
PREvsNORMAL pVal: 0 logFC: 2.03

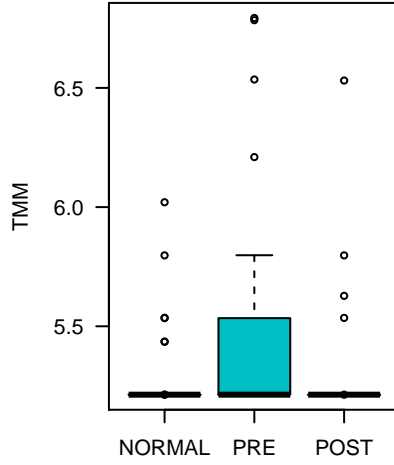

chr1:160691754-160697338\_HERVK-int CD48  
PREvsPOST pVal: 0.0015 logFC: 1.81  
PREvsNORMAL pVal: 8e-04 logFC: 1.59

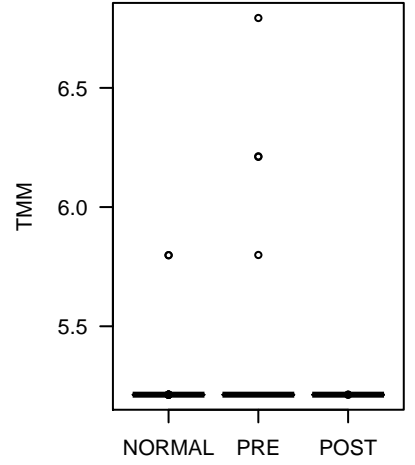

chr1:123833-124404\_L2c RP11-34P13.7  
PREvsPOST pVal: 0.0016 logFC: 1.8  
PREvsNORMAL pVal: 3e-04 logFC: 1.71

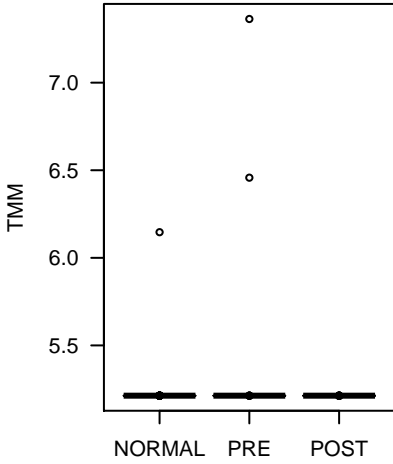

chr2:69867246-69868118\_L2 GMCL1  
PREvsPOST pVal: 0.0017 logFC: 1.8  
PREvsNORMAL pVal: 8e-04 logFC: 1.59

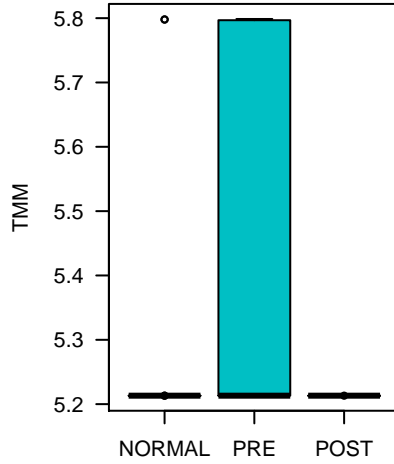

chr1:160511705-160518027\_L1PA10 SLAMF6  
PREvsPOST pVal: 0.0017 logFC: 1.86  
PREvsNORMAL pVal: 9e-04 logFC: 1.53

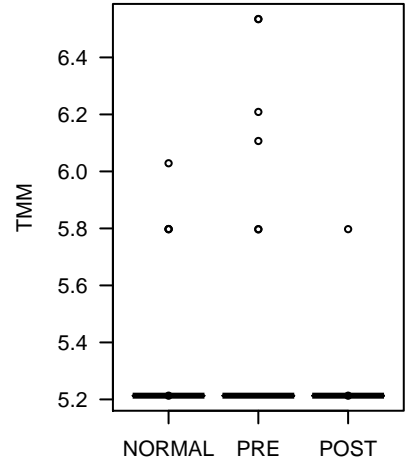

chr3:11318683-11319080\_L2c ATG7  
PREvsPOST pVal: 0.0017 logFC: 1.77  
PREvsNORMAL pVal: 0 logFC: 1.9

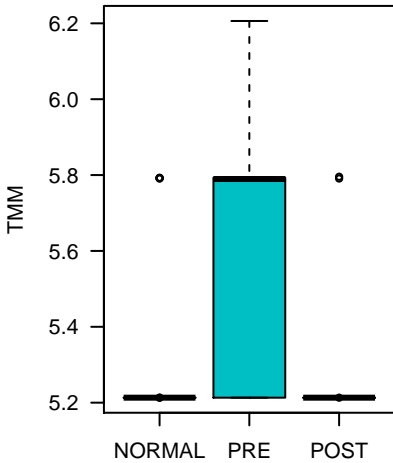

chr21:44802745-44803316\_L2a LINC01424  
PREvsPOST pVal: 0.0018 logFC: 1.76  
PREvsNORMAL pVal: 7e-04 logFC: 1.5

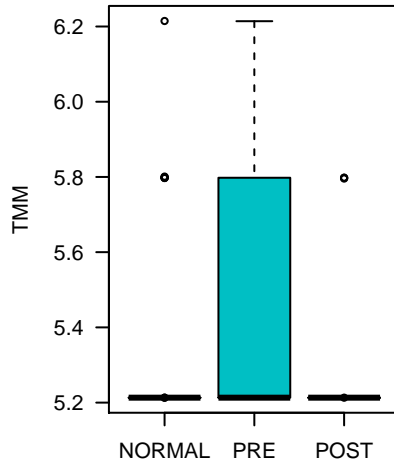

chr4:140126465-140127214\_L2 MAML3  
PREvsPOST pVal: 0.0019 logFC: 1.77  
PREvsNORMAL pVal: 7e-04 logFC: 1.62

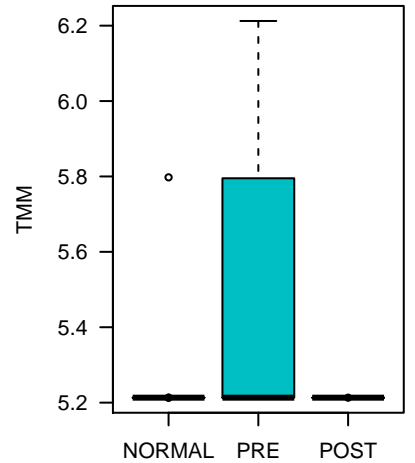

chr5:131687494-131689939\_L1MC2 CTC-432M15.3  
PREvsPOST pVal: 0.002 logFC: 1.76  
PREvsNORMAL pVal: 3e-04 logFC: 1.57

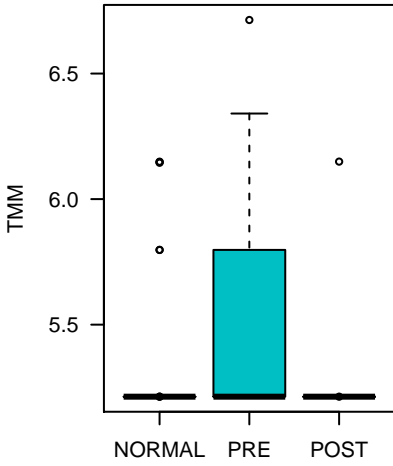

chr3:122746617-122748398\_SVA\_D HSPBAP1  
PREvsPOST pVal: 0.002 logFC: -1.75  
PREvsNORMAL pVal: 0.0086 logFC: -1.58

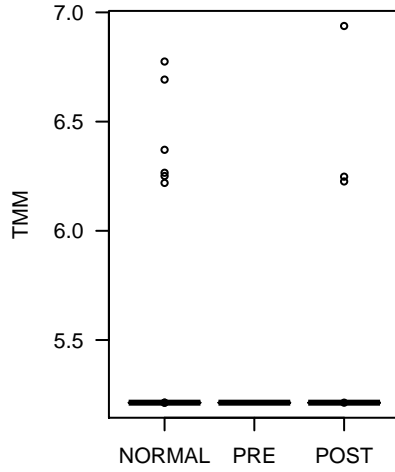

chr16:19904-21270\_L1P1 Z84812.4  
PREvsPOST pVal: 0.0021 logFC: -1.74  
PREvsNORMAL pVal: 0.0022 logFC: -1.81

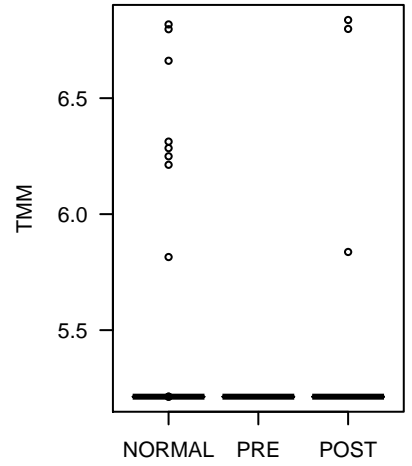

chr3:37059852-37060290\_L2 LRRFIP2  
PREvsPOST pVal: 0.0022 logFC: 1.75  
PREvsNORMAL pVal: 7e-04 logFC: 1.62

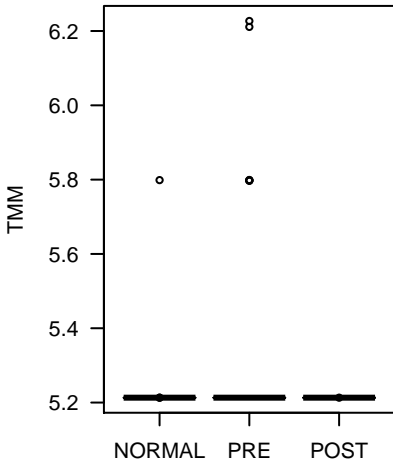

chr14:71078851-71085306\_L1PA7 PCNX1  
PREvsPOST pVal: 0.0022 logFC: 1.75  
PREvsNORMAL pVal: 7e-04 logFC: 1.62

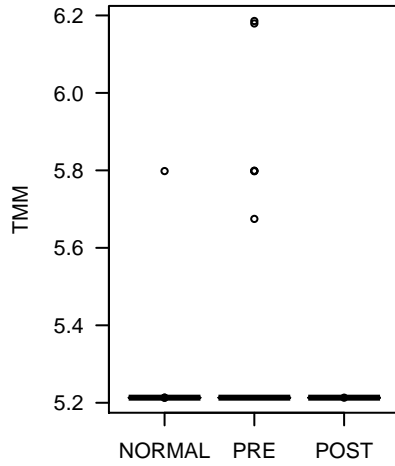

chr8:108500300-108506445\_L1PA4 .  
PREvsPOST pVal: 0.0022 logFC: -1.73  
PREvsNORMAL pVal: 0 logFC: -2.19

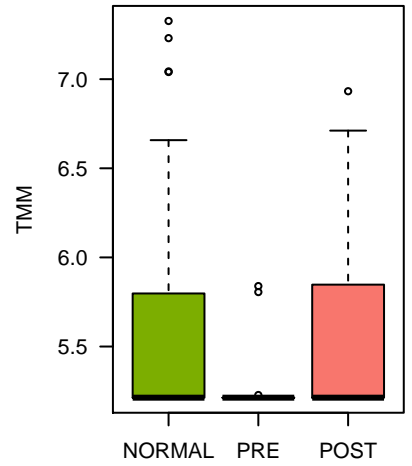

chr13:48067799-48071465\_MER61-int MED4  
PREvsPOST pVal: 0.0024 logFC: 1.79  
PREvsNORMAL pVal: 4e-04 logFC: 1.62

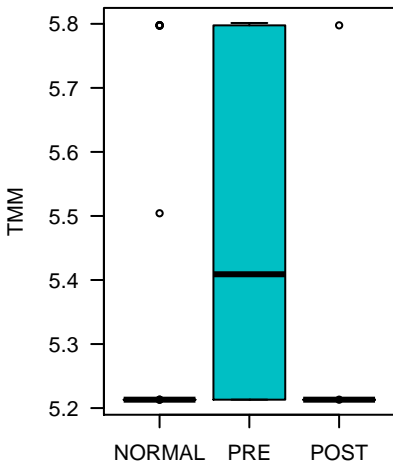

chr11:61988537-61991425\_L1PA10 .  
PREvsPOST pVal: 0.0025 logFC: -1.72  
PREvsNORMAL pVal: 0.0086 logFC: -1.58

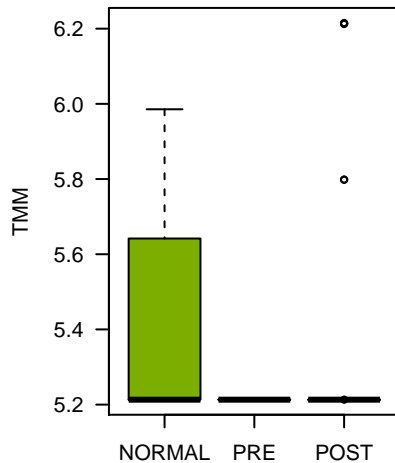

chr17:120380-120748\_MER21C .  
PREvsPOST pVal: 0.0025 logFC: 1.72  
PREvsNORMAL pVal: 9e-04 logFC: 1.57

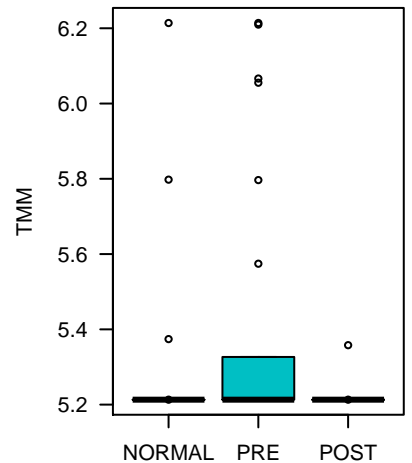

chr8:80982166-80983519\_L2a PAG1  
PREvsPOST pVal: 0.0026 logFC: 1.64  
PREvsNORMAL pVal: 3e-04 logFC: 1.57

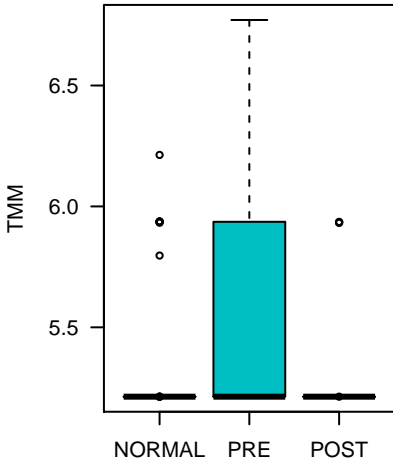

chr1:145654572-145656616\_L1PA10 GPR89A  
PREvsPOST pVal: 0.0028 logFC: 1.78  
PREvsNORMAL pVal: 3e-04 logFC: 1.67

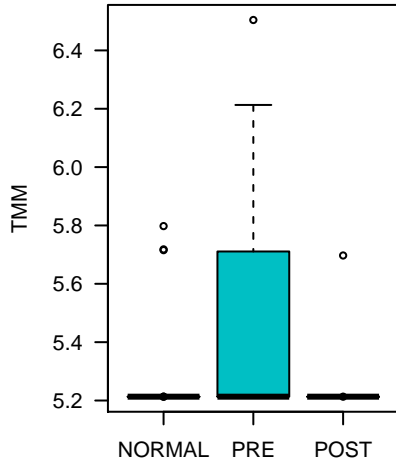

chr1:92388403-92394485\_L1PA7 RPAP2  
PREvsPOST pVal: 0.0031 logFC: -1.66  
PREvsNORMAL pVal: 0.0043 logFC: -1.7

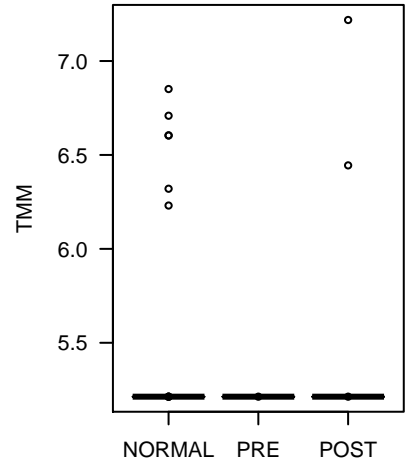

chr6:30524485-30526974\_L1PA6 .  
PREvsPOST pVal: 0.0033 logFC: -1.65  
PREvsNORMAL pVal: 1e-04 logFC: -2.25

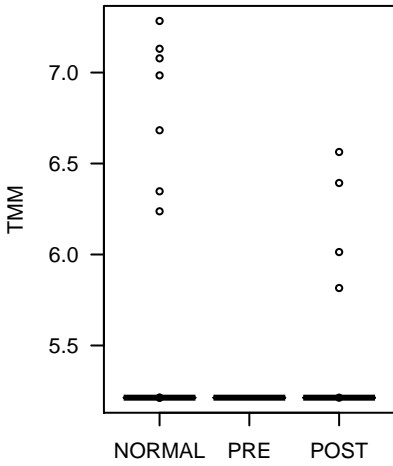

chr1:212766675-212768037\_L1PB2 NSL1  
PREvsPOST pVal: 0.0035 logFC: 1.67  
PREvsNORMAL pVal: 4e-04 logFC: 1.62

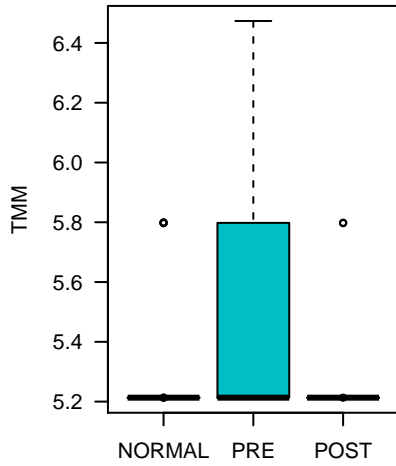

chr17:16781278-16783989\_L1PA11 RP11-219A15.1  
PREvsPOST pVal: 0.0036 logFC: -1.61  
PREvsNORMAL pVal: 8e-04 logFC: -1.95

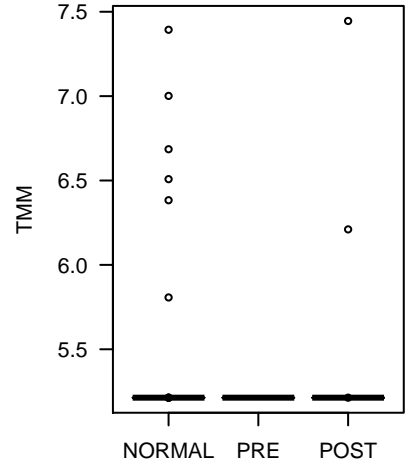

chr9:99994661-99995485\_L1MD ERP44  
PREvsPOST pVal: 0.0037 logFC: 1.62  
PREvsNORMAL pVal: 7e-04 logFC: 1.62

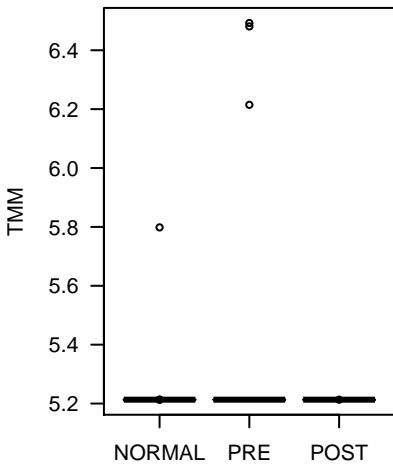

chr10:95794611-95795577\_L2b ENTPD1  
PREvsPOST pVal: 0.0039 logFC: 1.72  
PREvsNORMAL pVal: 8e-04 logFC: 1.51

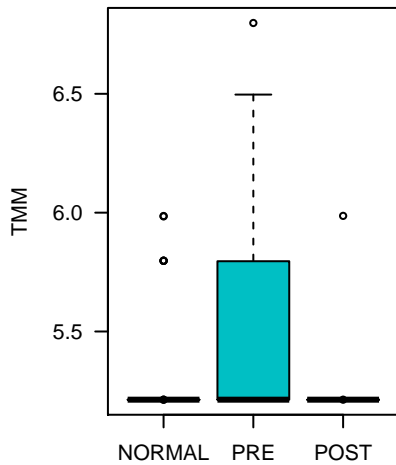

chr7:107569227-107570201\_L1MB2 DUS4L  
PREvsPOST pVal: 0.0039 logFC: -1.63  
PREvsNORMAL pVal: 0.0086 logFC: -1.58

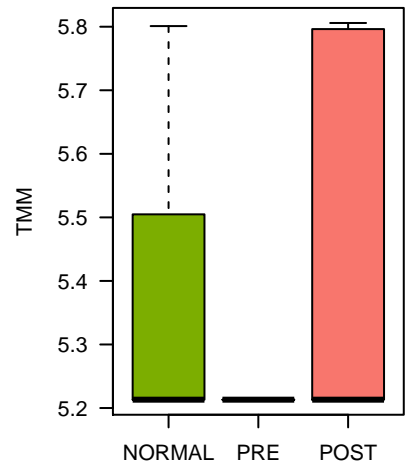

chr21:38283480-38283851\_L1ME4a KCNJ15  
PREvsPOST pVal: 0.0039 logFC: -1.63  
PREvsNORMAL pVal: 0.0086 logFC: -1.58

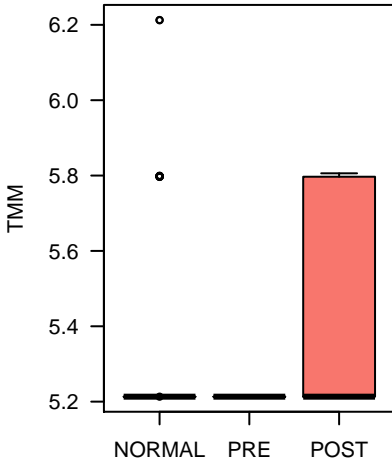

chr8:144750012-144750846\_L1MC1 ZNF251  
PREvsPOST pVal: 0.0039 logFC: -1.63  
PREvsNORMAL pVal: 0.0022 logFC: -1.81

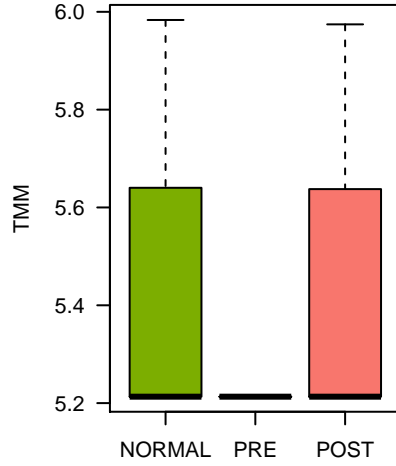

chr17:67988946-67989234\_AluSx1 .  
PREvsPOST pVal: 0.0039 logFC: 1.63  
PREvsNORMAL pVal: 4e-04 logFC: 1.66

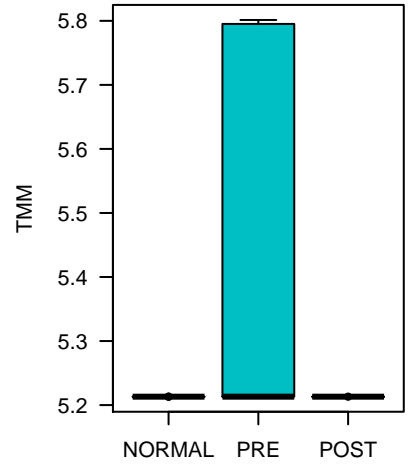

chr8:8194321-8194811\_LTR1A2 ENPP7P1  
PREvsPOST pVal: 0.0042 logFC: 1.56  
PREvsNORMAL pVal: 1e-04 logFC: 1.76

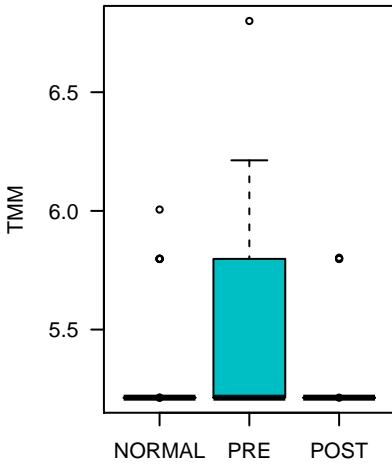

chr19:7414529-7414835\_AluSc CTD-2207O23.3  
PREvsPOST pVal: 0.0045 logFC: 1.69  
PREvsNORMAL pVal: 3e-04 logFC: 1.71

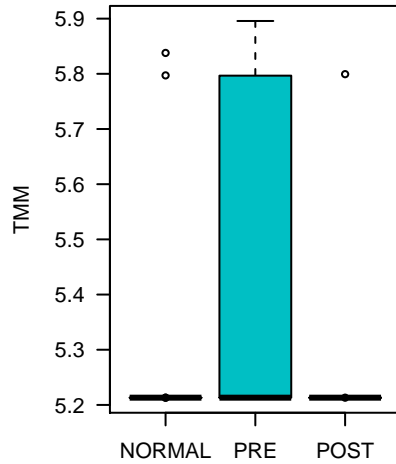

chr1:207612533-207613603\_LTR28C CR1  
PREvsPOST pVal: 0.0046 logFC: 1.59  
PREvsNORMAL pVal: 7e-04 logFC: 1.62

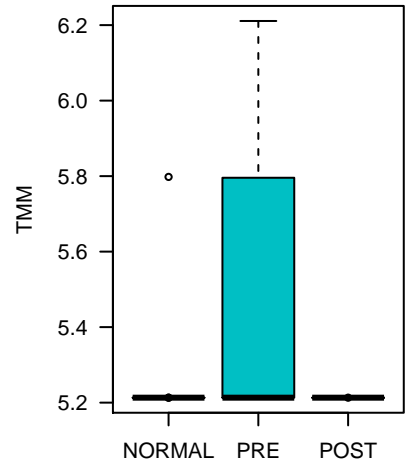

chr20:5542291-5542560\_L1MD .  
PREvsPOST pVal: 0.0047 logFC: 1.68  
PREvsNORMAL pVal: 9e-04 logFC: 1.53

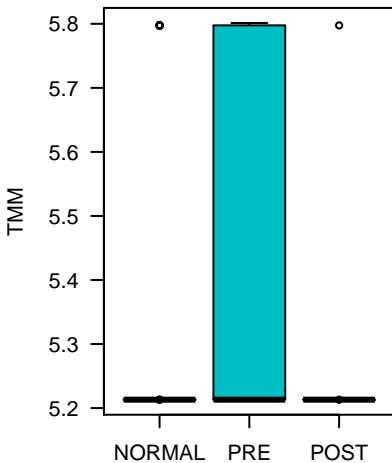

chr16:4110156-4110376\_MER66B ADCY9  
PREvsPOST pVal: 0.0047 logFC: 1.68  
PREvsNORMAL pVal: 9e-04 logFC: 1.55

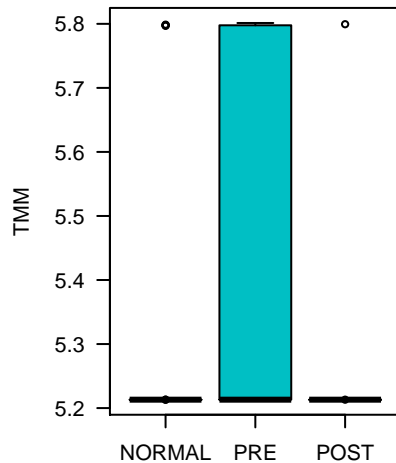

chr2:101346776-101348820\_L1MD1 CREG2  
PREvsPOST pVal: 0.0048 logFC: 1.68  
PREvsNORMAL pVal: 9e-04 logFC: 1.57

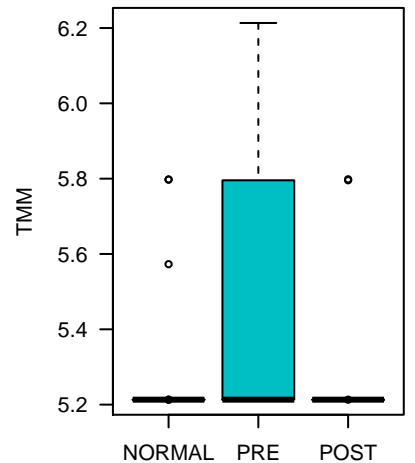

Supplement: MOESM2 [file 11357_2022_580_MOESM2_ESM.pdf]
